# Supplementary material
Source: PubMed Central journal article supplement (PMC8407476)
Supplement: NIHMS1057442-supplement-Supplemental_Data.pdf [file NIHMS1057442-supplement-Supplemental_Data.pdf]

**SUPPLEMENTARY MATERIALS for**

**Therapeutically relevant engraftment of a CRISPR/Cas9-edited HSC-enriched population with HbF reactivation in nonhuman primates**

**Authors:** Olivier Humbert, Stefan Radtke, Clare Samuelson, Ray R Carrillo, Anai M Perez, Sowmya S. Reddy, Christopher Lux, Sowmya Pattabhi, Lauren E Schefter, Olivier Negre, Ciaran M. Lee, Gang Bao, Jennifer E. Adair, Christopher W. Peterson, David J Rawlings, Andrew M. Scharenberg, and Hans-Peter Kiem

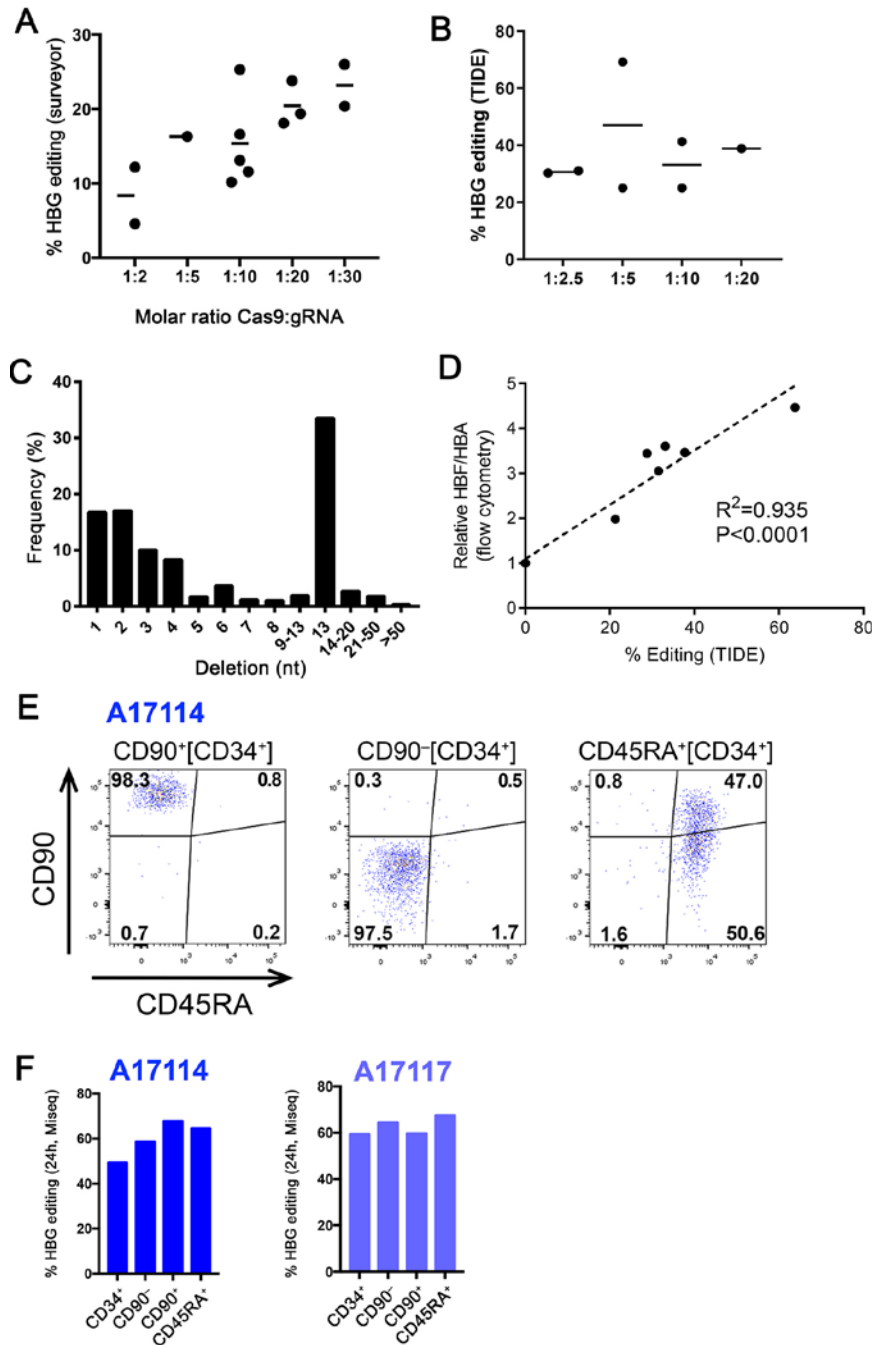

**Fig. S1. Optimization of HBG editing in NHP HSPCs.** (A), (B) Titration of molar ratios of Cas9 purified protein to gRNA for optimization of HBG-editing in NHP CD34<sup>+</sup> cells (A) or mobilized PB Human CD34<sup>+</sup> cells (B). Editing efficiency was determined by Surveyor assay (A) or TIDE (B) at 3-10 days after electroporation. Each circle shows a separate electroporation reaction using cells from a total of 2 (human) or 3 (NHP) donors. Lines show mean for each indicated molar ratio. (C) Size of deletion (in nucleotides, nt) induced at the CRISPR/Cas9 target site in edited NHP CD34<sup>+</sup> cells from one representative donor at 4 days after treatment. Results are from next-generation sequencing analysis with all deletions normalized to 100%. (D) Correlation by linear regression analysis of the % of in vitro differentiated CD34<sup>+</sup> cells expressing HbF over % cells expressing HbA (HbF/HbA, determined by flow cytometry) relative to editing efficiency determined by TIDE. (E) Flow cytometric validation of HSPC fractions sorted from enriched CD34<sup>+</sup> cells obtained from animal A17114. (F, HBG editing efficiency in HSPC-sorted subsets from the indicated animals.

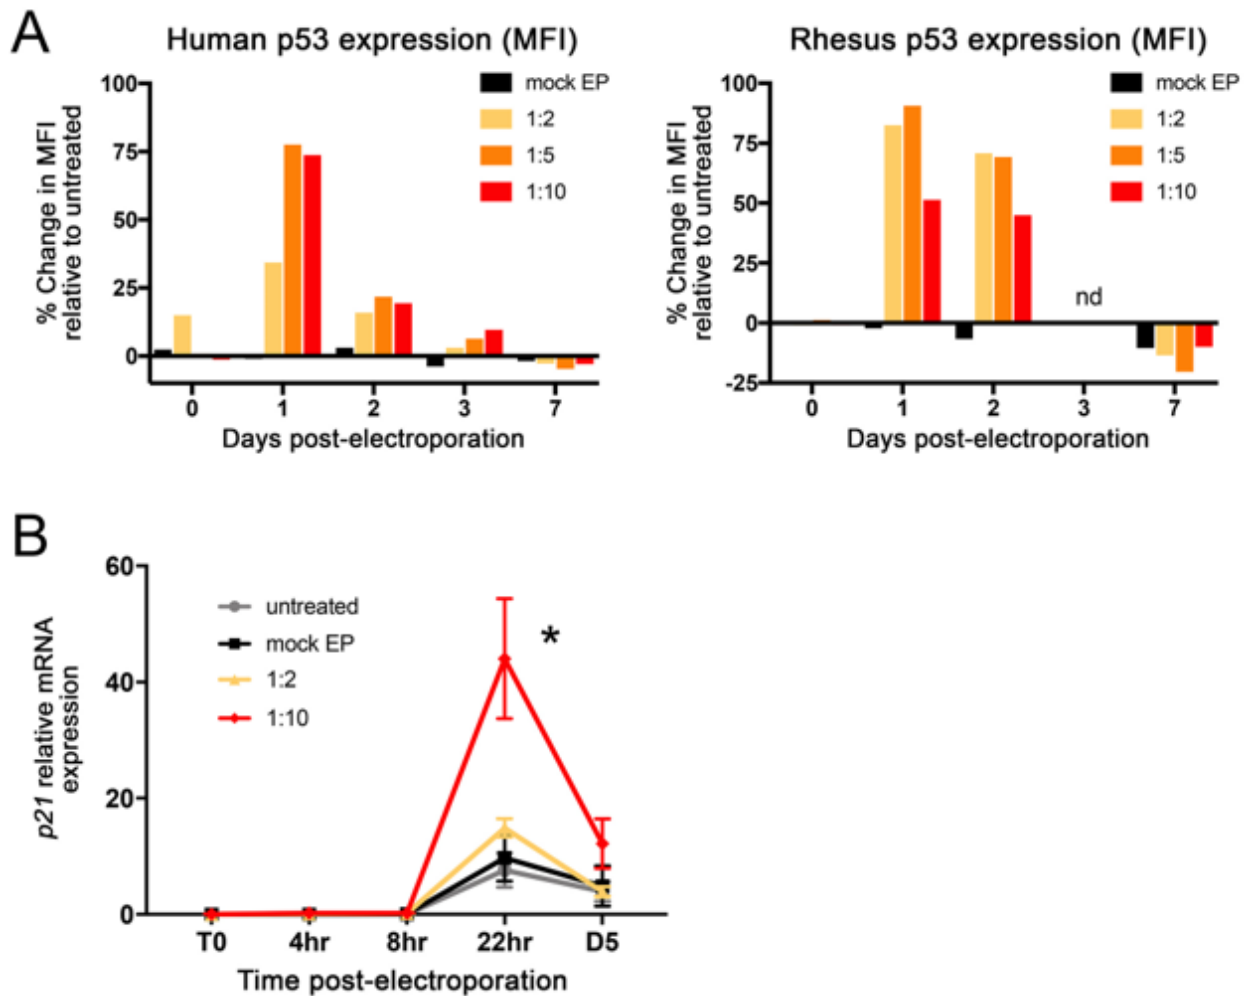

**Fig. S2. Induction of the p53/p21 DNA damage response in human and rhesus CD34<sup>+</sup> HSPCs treated with CRISPR/Cas9.** (A) p53 induction as measured by intracellular flow cytometric staining and quantified as mean fluorescence intensity (MFI) in mock electroporated (EP) CD34<sup>+</sup> HSPCs or in cells treated with increasing molar ratios of Cas9 protein to gRNA relative to untreated cells. Results are from human (left) and rhesus CD34<sup>+</sup> HSPCs (right). (B) RT-qPCR analysis of *p21* (*CDKN1A*) mRNA expression in rhesus CD34<sup>+</sup> HSPCs treated as described in (A) relative to *GAPDH*. Data are mean and SEM from triplicate reactions run from one donor. \* denotes statistical significance of the difference between the 1:10 reaction and the untreated or mock EP (two-tailed unpaired t-test,  $P < 0.05$ ).

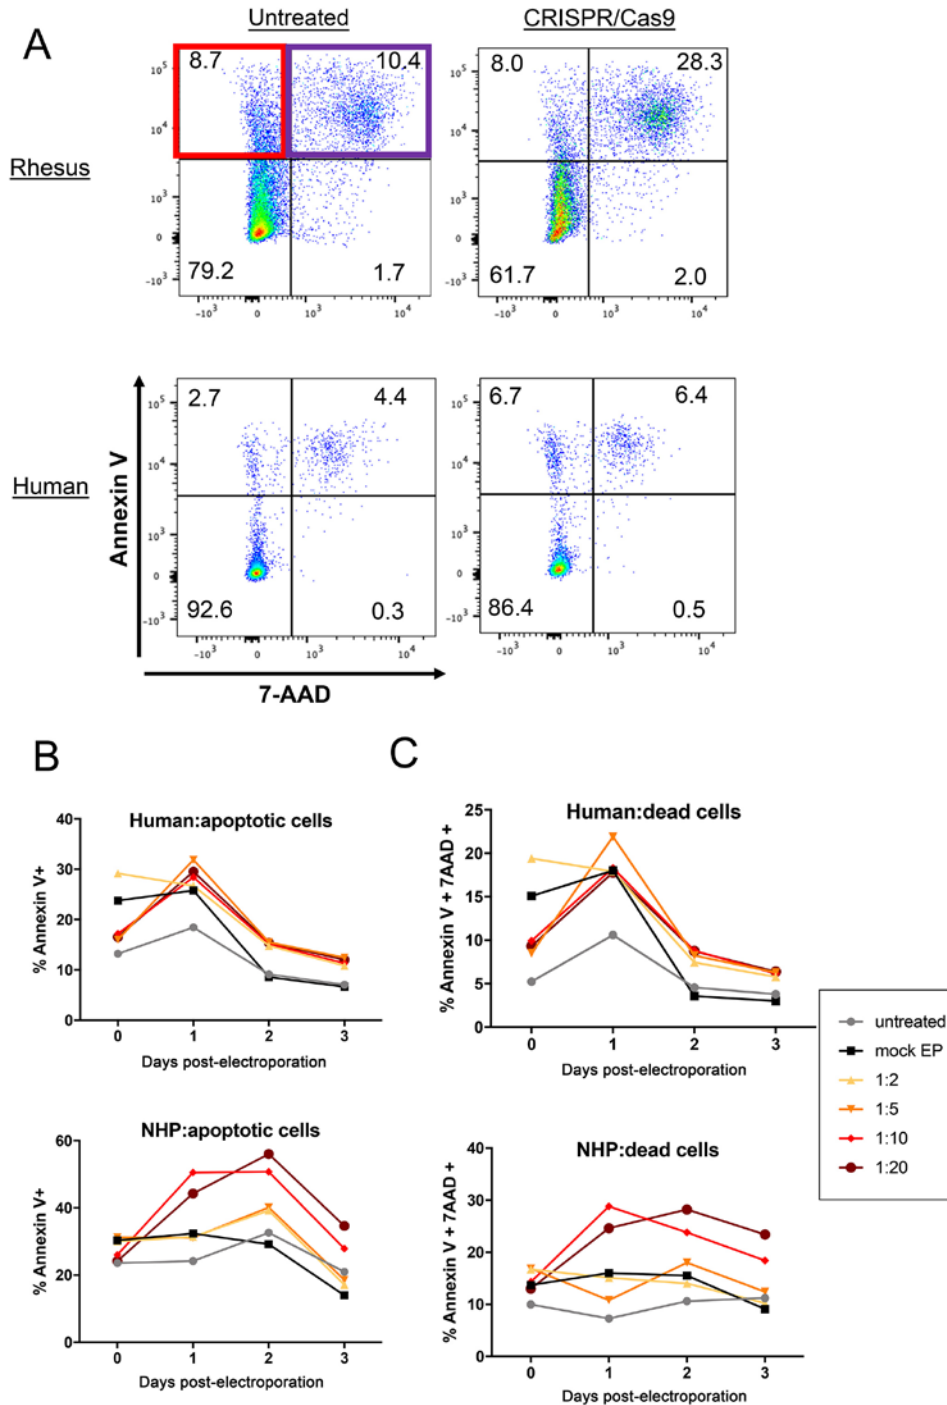

**Fig. S3. CRISPR/Cas9-induced cell death and apoptosis in human and rhesus HSPCs.** (A) Representative flow plots of annexin V/7-AAD staining in rhesus and human CD34<sup>+</sup> HSPCs. Annexin V staining indicates apoptotic cells (red frame) and annexin V/7-AAD dual staining (purple frame) shows dead cells. (B), (C) Quantification of apoptosis (B) and cell death (C) of human (top) and rhesus (bottom) CD34<sup>+</sup> HSPCs left untreated, treated by mock electroporation (EP), or treated with increasing molar ratios of Cas9 protein to gRNA. Results are from one donor and comparable results were obtained using a different donor.

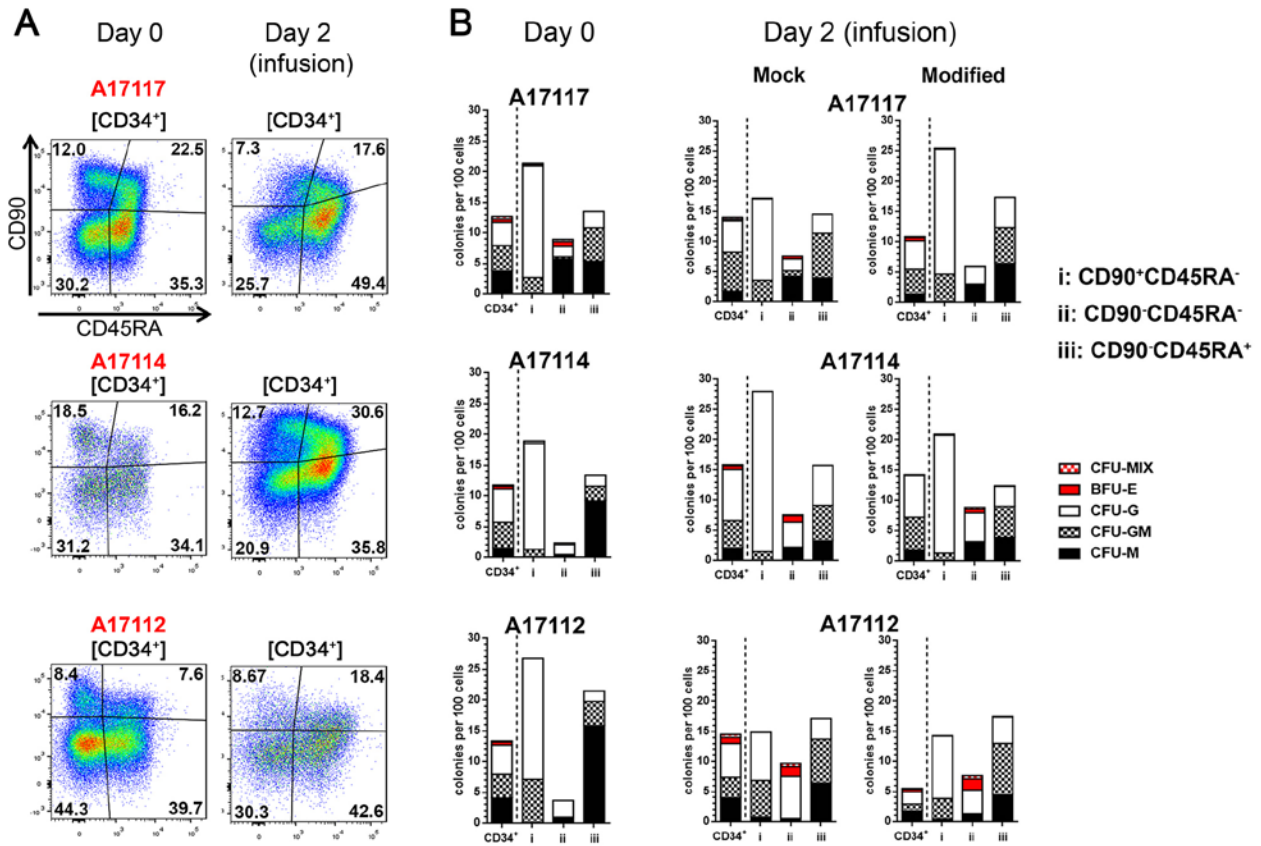

**Fig. S4. Immunophenotypic and functional characterization of infusion products of CD34 transplants.** (A) Flow cytometric analysis of CD34<sup>+</sup> enriched cells at time of enrichment (day 0) or after editing at time of infusion (day 2) using the markers CD90 and CD45RA in the three CD34<sup>+</sup>/CRISPR transplanted animals. (B) CFCs obtained from bulk CD34<sup>+</sup> enriched cells or from the indicated HSPC subsets in CD34<sup>+</sup>/CRISPR transplanted animals at time of enrichment (day 0) or infusion (day 2) in mock-electroporated and CRISPR/Cas9-treated cells.

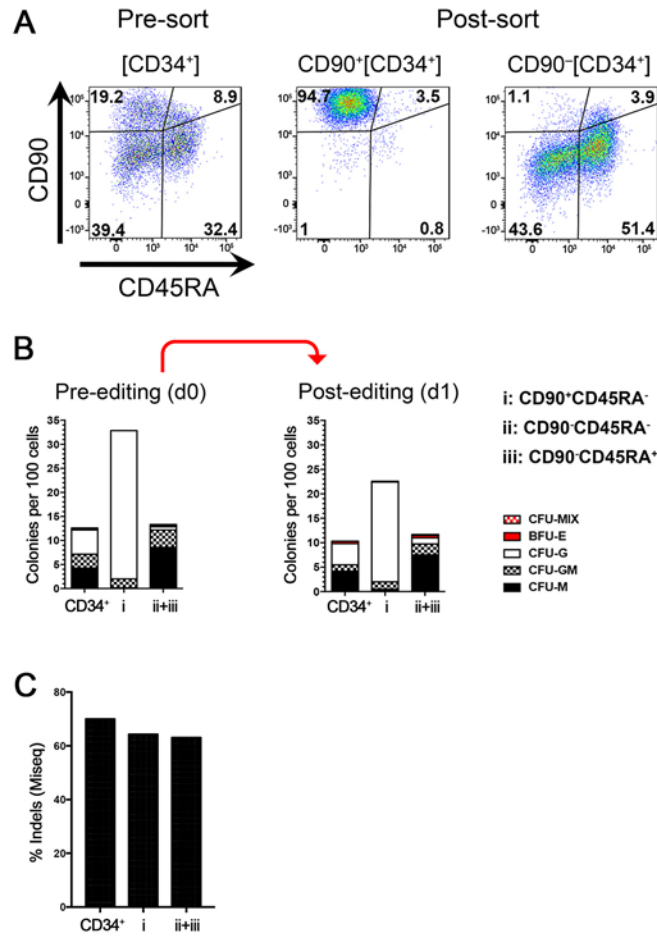

**Fig. S5. In vitro validation of the CD90<sup>+</sup> sorting/editing approach.** (A) Flow cytometric analysis of CD34<sup>+</sup> enriched cells before (pre-sort) and after (post-sort) sorting for the CD90<sup>+</sup> population from animal A17114. (B) CFC assay from the cells shown in (A) before and 24 hours after CRISPR/Cas9-editing. (C) Editing efficiency measured in CD34<sup>+</sup> enriched cells, and in the CD90<sup>+</sup> and CD90<sup>-</sup> fractions (obtained from (A)) by Miseq analysis at 3 days after treatment.

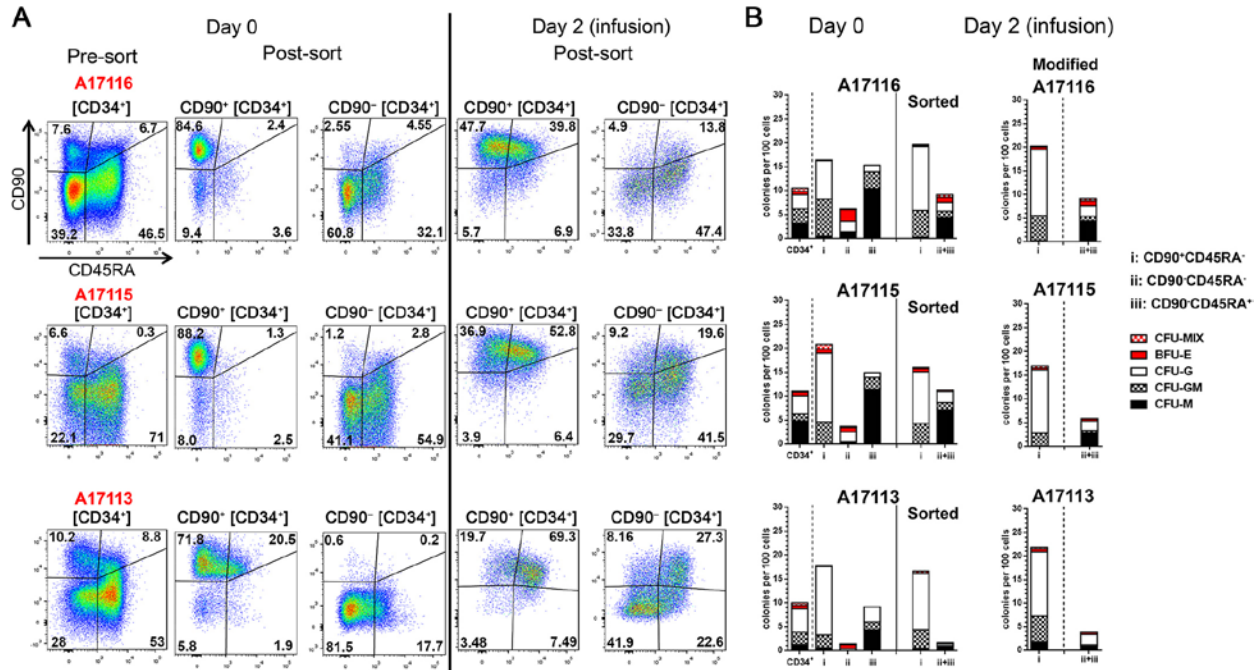

**Fig. S6. Immunophenotypic and functional characterization of infusion products of CD90 transplants.** (A) Flow cytometric analysis of CD34<sup>+</sup> enriched cells before (left) and after (right) CD90 sorting at time of enrichment (day 0) or at time of infusion (day 2) in the three CD90<sup>+</sup>/CRISPR transplanted animals. (B) CFCs obtained from bulk CD34<sup>+</sup> enriched cells or from the indicated HSPC subsets in CD90<sup>+</sup>/CRISPR transplanted animals at time of enrichment (day 0) or infusion (day 2).

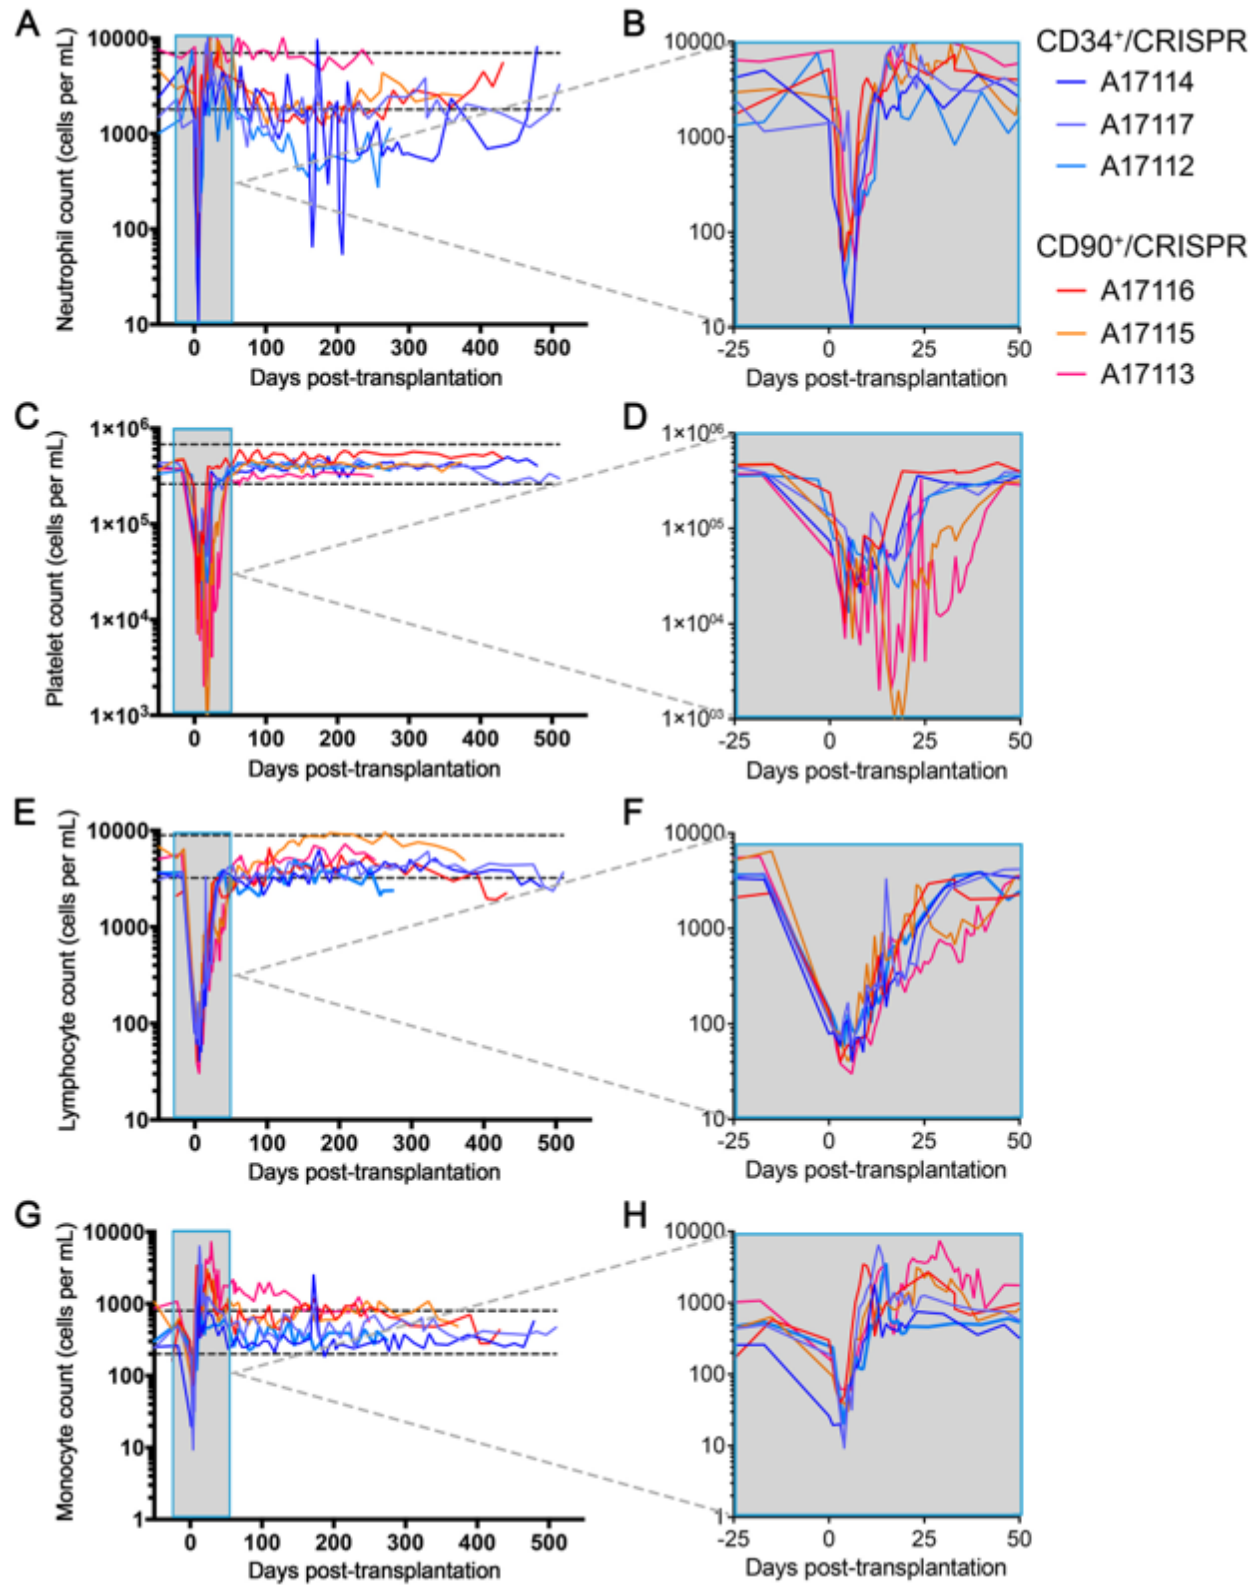

**Figure S7. Complete blood cell count in transplanted animals.** Day 0 shows time of transplant. Dashed lines show normal count range for each lineage. The graphs on the right magnify blood cell count shown in gray area on the left up to 50 days after transplant.



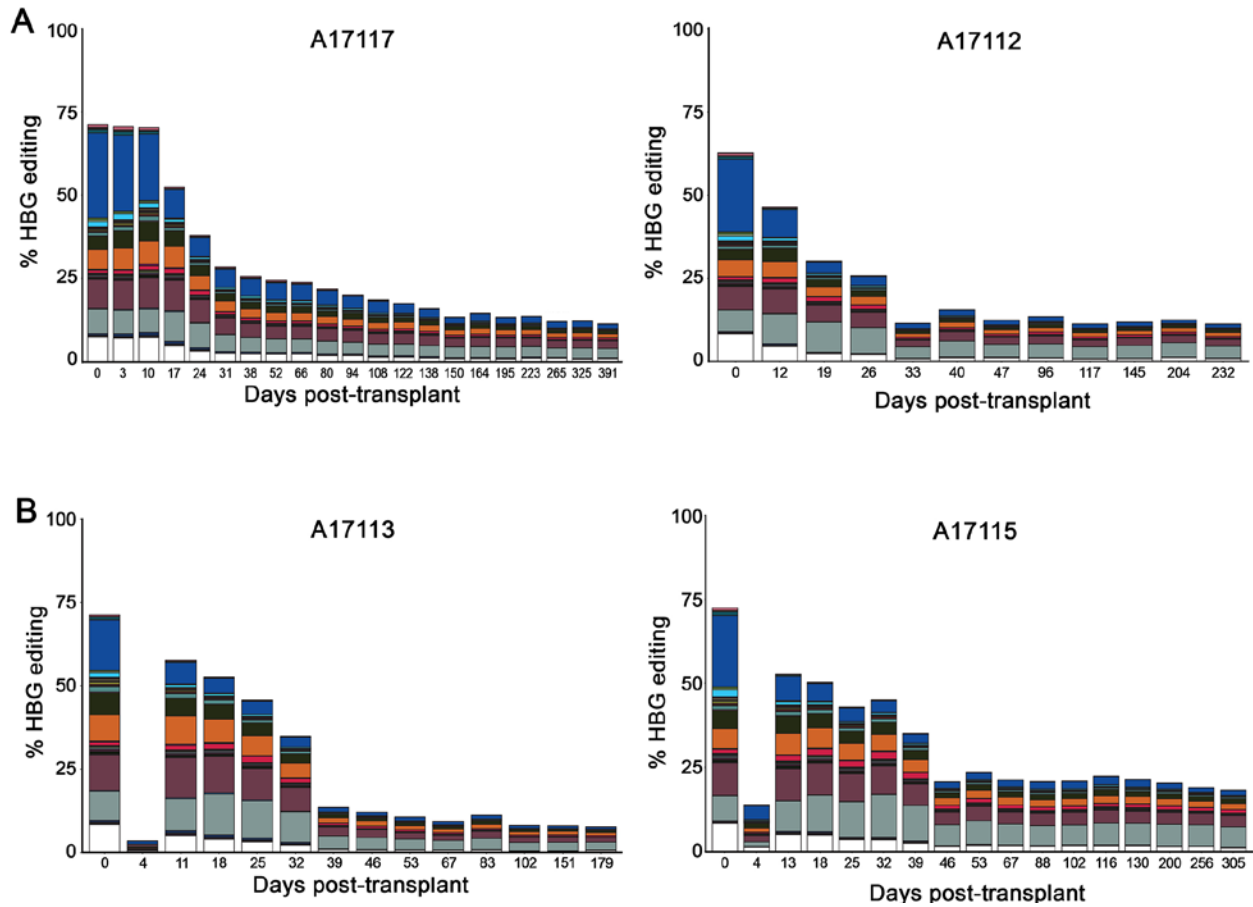

**Figure S8. Tracking of deletion profiles in transplanted animals.** Deletion profile was determined by next generation sequencing analysis of PB sampled at different time points after transplant in the CD34<sup>+</sup>/CRISPR cohort (**A**) or in the CD90<sup>+</sup>/CRISPR cohort (**B**). Each colored box denotes the individual contribution of an identified distinct deletion to the total sequencing pool and the white portion shows all combined deletions contributing less than 1% to the total pool. The 13-nt HPFH deletion is shown in the dark blue box on top.

### A Human vs. rhesus alpha globin 1

```
1 MVLSPADKTNVKAAWGKVGHAHAGEYGAEALERMFSLFPTTKTYFPHFDLS 50
  |||:|||||.|||||
1 MVLSPADKSNVKAAWGKVGGHAGEYGAEALERMFSLFPTTKTYFPHFDLS 50

51 HGSAQVKGHGKKVADALTNVAHVDDMPNALSALSDLHAHKLRVDPVNFK 100
  |||.|.|||||.|||||
51 HGSAQVKGHGKKVADALTLAVGHVDDMPQALSALSDLHAHKLRVDPVNFK 100

101 LLSHCLLVTLAAHLPAEFTPAVHASLDKFLASVSTVLTSKYR 142
  |||:|||||.|||||
101 LLSHCLLVTLAAHLPAEFTPAVHASLDKFLASVSTVLTSKYR 142
```

### B Human vs. rhesus beta globin

```
1 MVHLTPEEKSAVTALWGKVVNDEVGGEALGRLLVVYPWTQRFFESFGDLS 50
  |||:|||||.|||||
1 MVHLTPEEKNAVTTLWGKVVNDEVGGEALGRLLVVYPWTQRFFESFGDLS 50

51 TPDVAVMGNPKVKAHGKKVLGAFSDGLAHLNLDLKGTFATLSELHCDKLHVD 100
  :|||||.|||||
51 SPDAVMGNPKVKAHGKKVLGAFSDGLNHLNLDLKGTFATLSELHCDKLHVD 100

101 PENFRLGNVLCVLAHFGKEFTPPVQAAAYQKVVAGVANALAHKYH 147
  |||:|||||.|||||
101 PENFKLLGNVLCVLAHFGKEFTPPVQAAAYQKVVAGVANALAHKYH 147
```

### C Human vs. rhesus gamma globin

```
1 MGHFTEEDKATITSLWGKVNVEDAGGETLGRLLVVYPWTQRFFDSFGNLS 50
  |||:|||||.|||||
1 MGHFTEEDKATITSLWGKVNVEDAGGETLGRLLVVYPWTQRFFDSFGNLS 50

51 SASAIMGNPKVKAHGKKVLTSLGDAIKHLDDLKGTFAQLSELHCDKLHVD 100
  |||:|||||.|||||
51 SASAIMGNPKVKAHGKKVLTSLGDAIKNLDDLKGTFAQLSELHCDKLHVD 100

101 PENFKLLGNVLTVLAIHFGKEFTPEVQASWQKMTAVASALSSRYH 147
  |||:|||||.|||||
101 PENFRLGNVLTVLAIYFGKEFTPEVQASWQKMTAVASALSSRYH 147
```

**Figure S9. Conservation of globin polypeptide sequences between human and rhesus macaque.** Alignment of alpha (A), beta (B) and gamma (C) globin polypeptide sequences between human (top) and rhesus macaque (bottom). Sequences are from reference genome sequences available in the UCSC Genome Browser <http://genome.ucsc.edu/>.



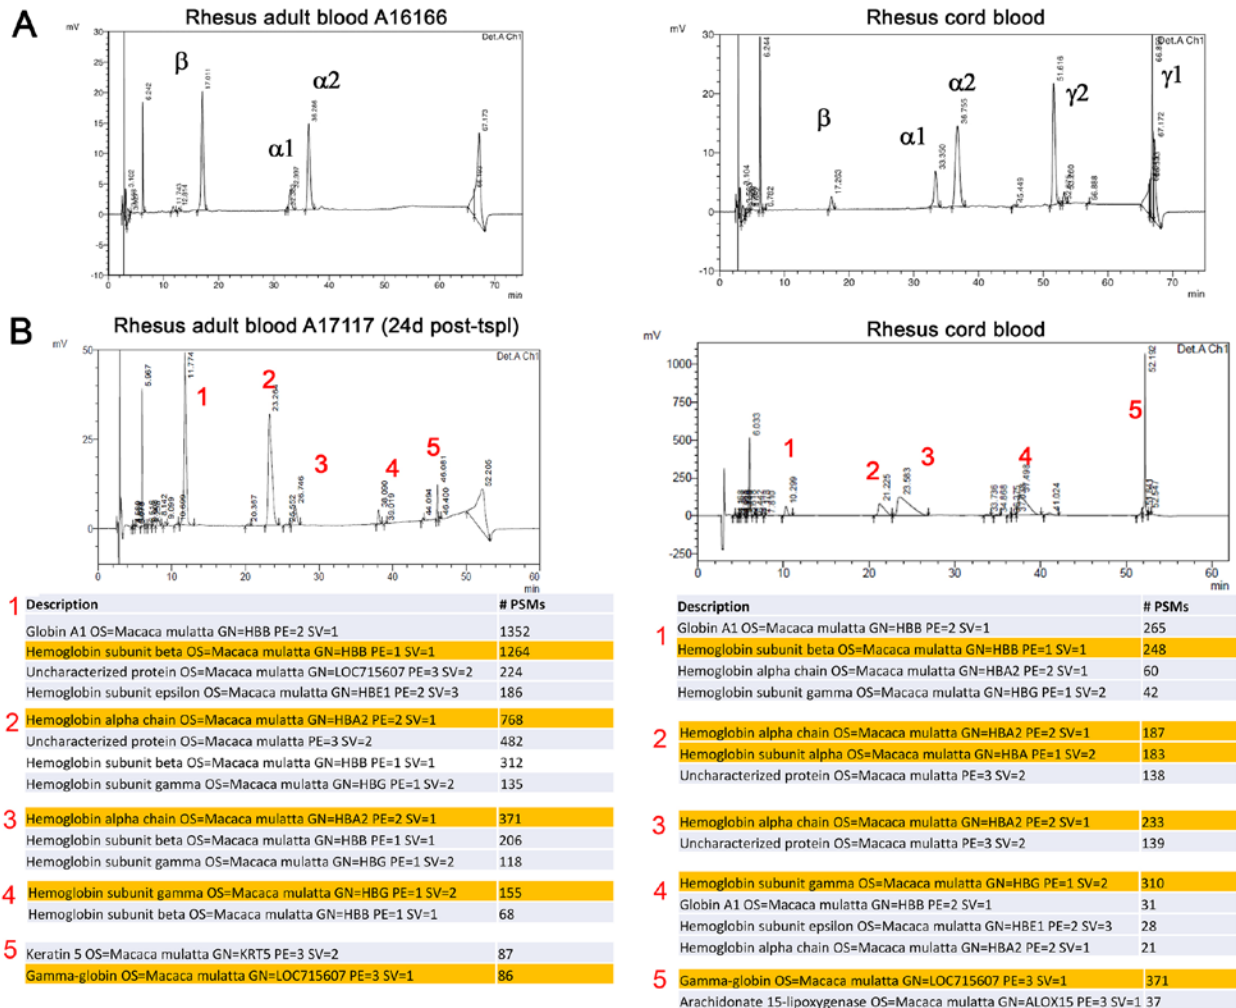

**Figure S11. Validation of reverse phase-HPLC approach for the analysis of hemoglobin from NHP blood. (A)** HPLC analysis of rhesus macaque adult PB (left) and cord blood (right) showing different peaks corresponding to the different globin peptides. **(B)** Mass spectrometry analysis of individual peaks eluted from A17117 PB at 24 days after transplant (left) and from cord blood (right). The top peptide candidates based on peptide-spectrum match (PSM) scoring are given in the table and the predominant globin species are highlighted.

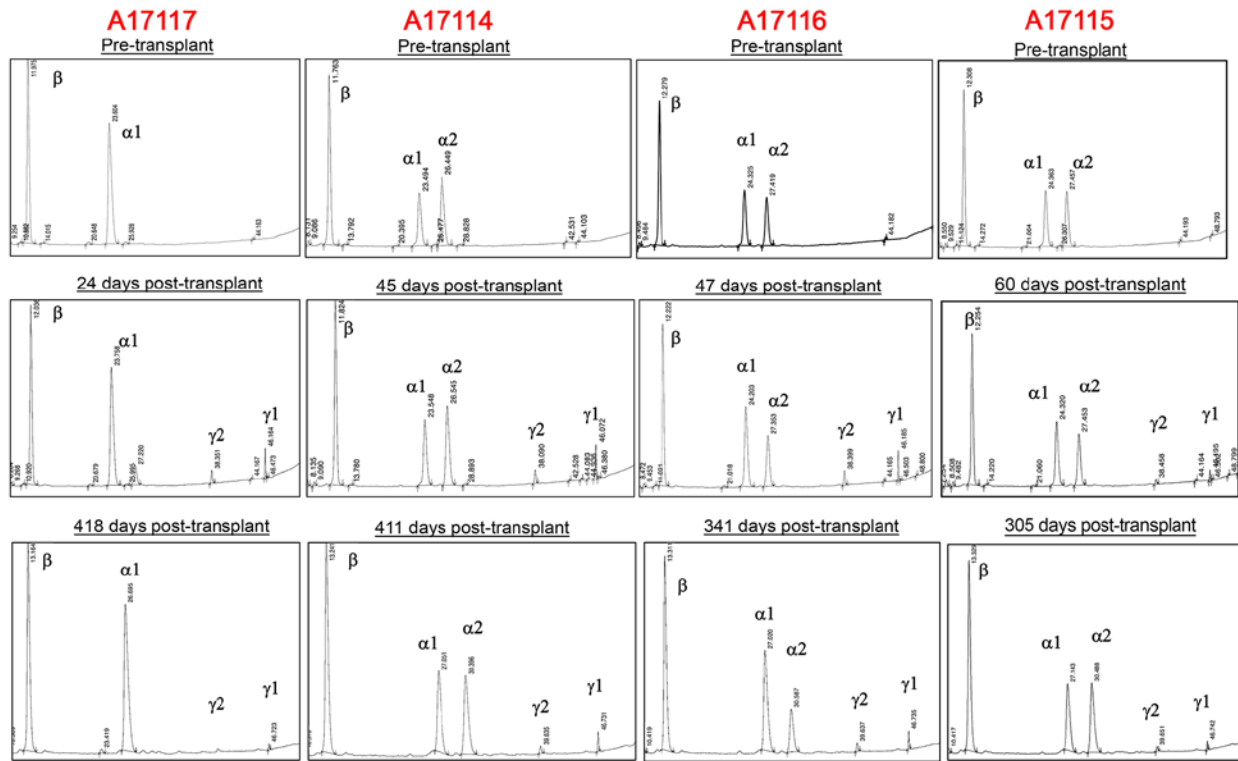

**Figure S12. Representative HPLC profiles of PB from transplanted animals.** HPLC analysis of PB from transplanted animals pre-treatment (top row), at 1- to 2-months after treatment (middle row) and at approximately 1-year after treatment (bottom row). The identity of the different globin peaks is given.

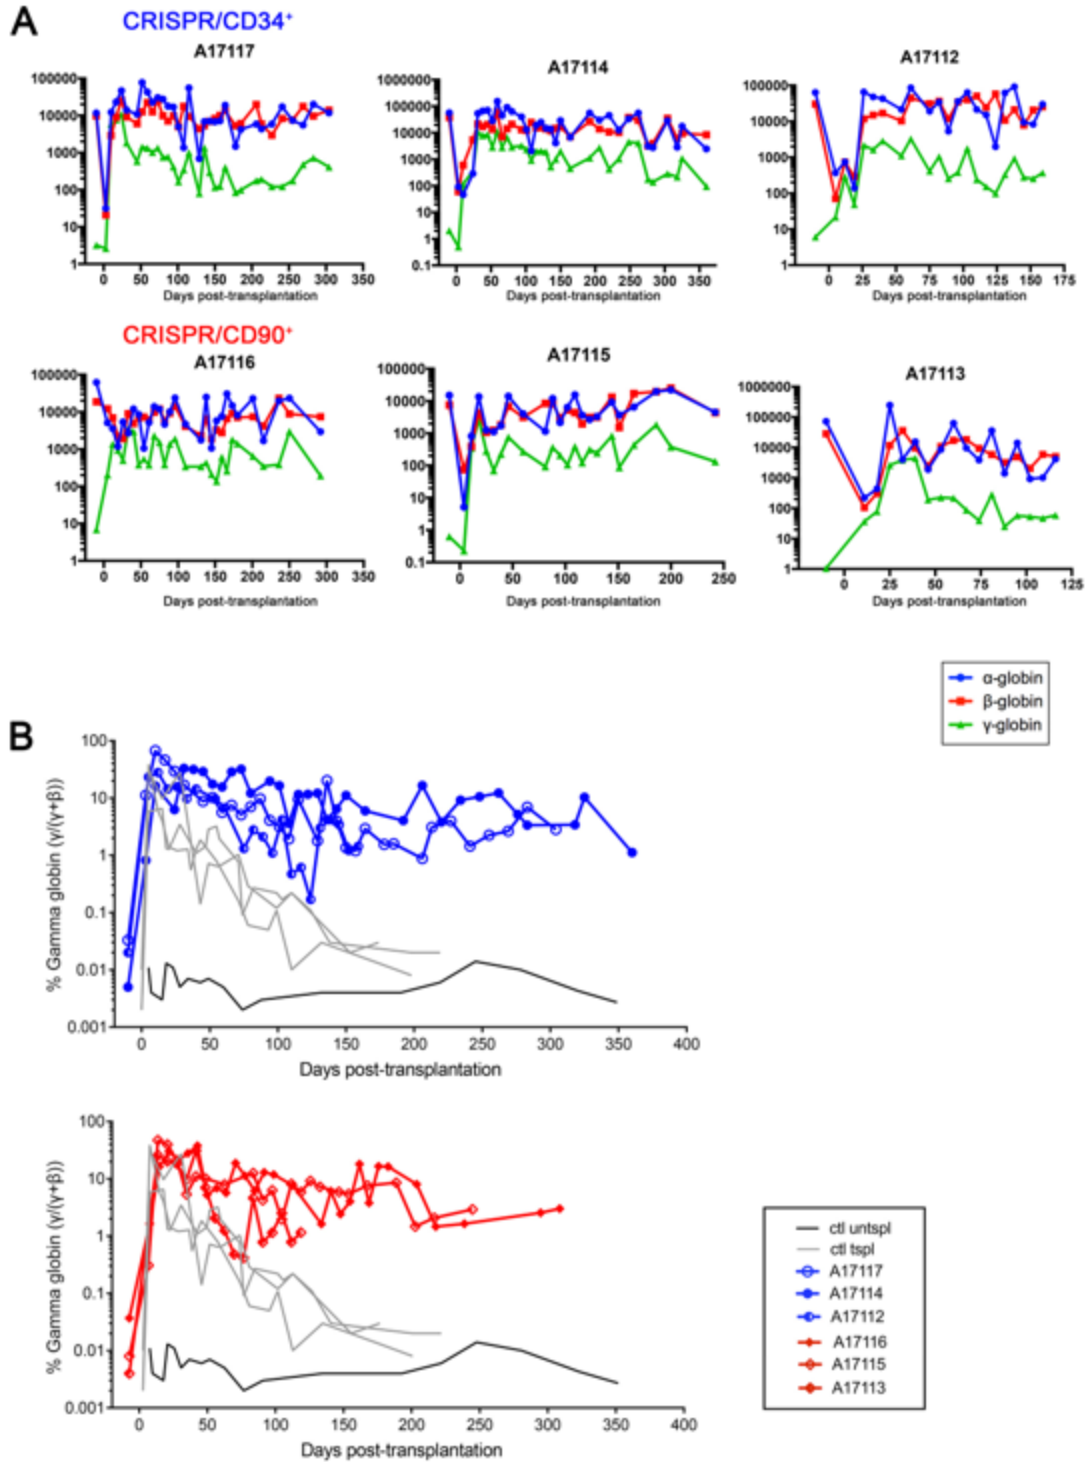

**Figure S13. Quantitative PCR measurement of globin transcripts from PB of transplanted animals.** (A) Time course measurement of globin transcripts from PB of transplanted animals from the CD34<sup>+</sup> (top) or CD90<sup>+</sup> (bottom) cohort. (B)  $\gamma$ -globin expression in all CRISPR/Cas9 transplanted animals calculated as  $\gamma/(\gamma+\beta)$  and compared to historical control transplant animals (gray) and an untransplanted control (black).

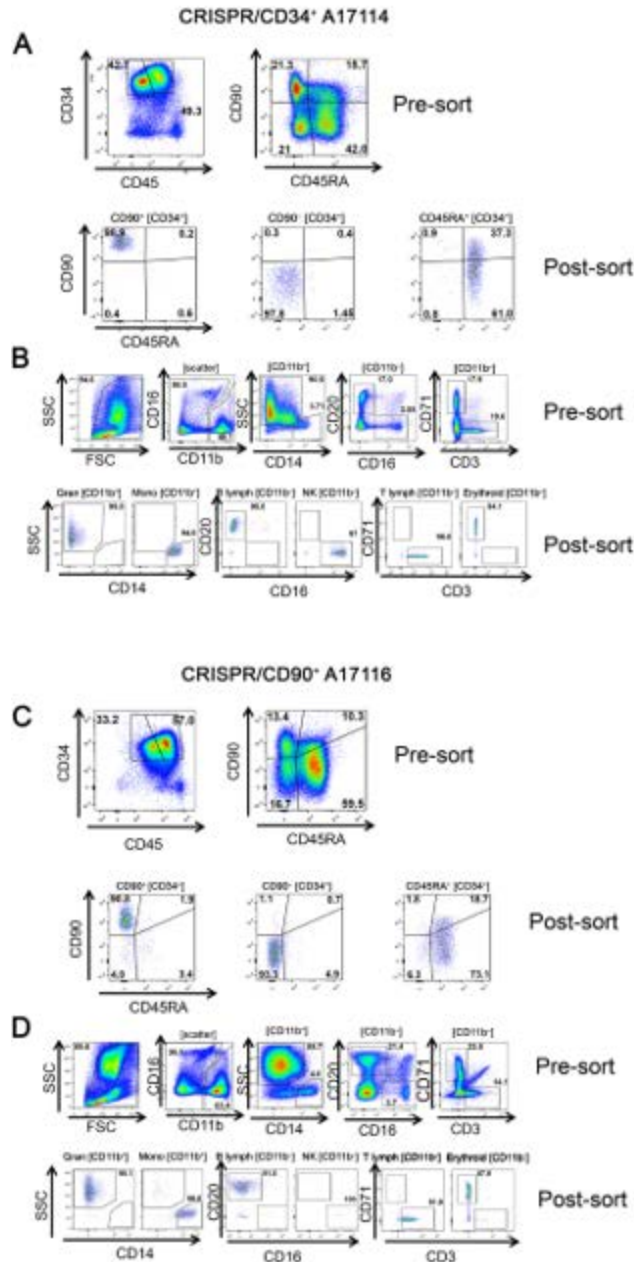

**Figure S14. Flow cytometric validation of sorting approach of HPSC subsets and cell lineages from 6-month BM of transplanted animals.** Flow cytometric analysis of CD34<sup>+</sup> enriched cells before (top) and after (bottom) sorting for HSPCs subsets (**A**) or for cell lineages (B) from BM of animal A17114. Flow cytometric analysis of CD34<sup>+</sup> enriched cells before (top) and after (bottom) sorting for HSPCs subsets (C) or for cell lineages (D) from BM of animal A17116

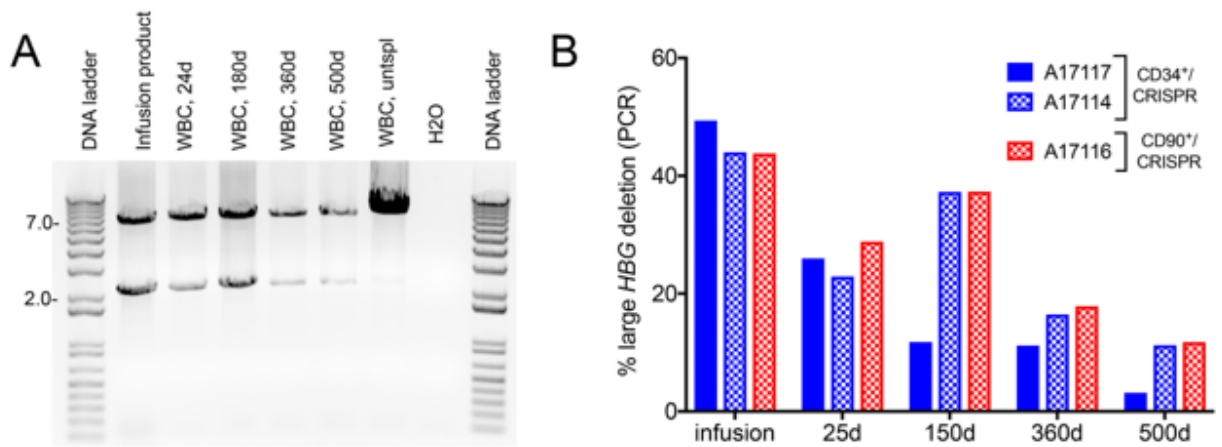

**Figure S15. Long-range PCR analysis of large *HBG* deletion.** (A) Representative agarose gel electrophoresis for long-range PCR performed on the infusion product and PB white blood cells (WBCs) sampled at different times after transplant from animal A17114. WBCs from an untransplanted (untspl) animal were used as control. Top band is indicative of intact allele and bottom band shows large deletion. (B) Semi-quantitative measurement of *HBG* large deletion by densitometry analysis of top and bottom bands in the indicated animals.



**Table S1. Quantitative PCR analysis of cytomegalovirus (CMV) DNA in PB of transplanted animals**

| CD34+ transplant |            |                       |               |
|------------------|------------|-----------------------|---------------|
| Animal ID        | Date       | Days after transplant | CMV copies/ml |
| A17117           | 6/15/2017  | *pre                  | 665.5         |
|                  | 7/12/2017  | pre                   | 0             |
|                  | 7/18/2017  | 4                     | 0             |
|                  | 7/25/2017  | 11                    | 0             |
|                  | 8/2/2017   | 19                    | 0             |
|                  | 8/7/2017   | 24                    | 0             |
|                  | 8/8/2017   | 25                    | 0             |
|                  | 8/15/2017  | 32                    | 0             |
| A17114           | 7/18/2017  | pre                   | 0             |
|                  | 8/7/2017   | 3                     | 0             |
|                  | 1/23/2018  | 172                   | 925           |
|                  | 2/20/2018  | 200                   | 0             |
|                  | 2/23/2018  | 203                   | 0             |
|                  | 3/13/2018  | 228                   | 0             |
|                  | 3/27/2018  | 242                   | 0             |
|                  | 4/10/2018  | 256                   | 0             |
|                  | 4/24/2018  | 270                   | 0             |
|                  | 5/1/2018   | 277                   | 0             |
|                  | 5/8/2018   | 284                   | 0             |
|                  | 5/15/2018  | 291                   | 0             |
|                  | 5/22/2018  | 298                   | 0             |
|                  | 6/5/2018   | 304                   | 0             |
| A17112           | 10/11/2017 | pre                   | 0             |
|                  | 10/18/2017 | pre                   | 1470.5        |
|                  | 10/31/2017 | pre                   | 0             |
|                  | 1/23/2018  | pre                   | 0             |
|                  | 2/12/2018  | 4                     | 0             |
|                  | 2/20/2018  | 12                    | 0             |
|                  | 2/22/2018  | 14                    | 0             |
|                  | 3/1/2018   | 21                    | 0             |
|                  | 3/13/2018  | 33                    | 0             |
|                  | 3/20/2018  | 40                    | 0             |
|                  | 3/26/2018  | 46                    | 0             |
|                  | 4/10/2018  | 61                    | 0             |

| CD90+ transplant |            |                       |               |
|------------------|------------|-----------------------|---------------|
| Animal ID        | Date       | Days after transplant | CMV copies/ml |
| A17116           | 9/12/2017  | pre                   | 0             |
|                  | 11/3/2017  | 33                    | 792.5         |
|                  | 12/1/2017  | 64                    | 0             |
|                  | 12/5/2017  | 68                    | 0             |
|                  | 12/19/2017 | 82                    | 0             |
| A17115           | 10/18/2017 | pre                   | 2364          |
|                  | 10/31/2017 | pre                   | 0             |
|                  | 12/7/2017  | 20                    | 740.5         |
|                  | 12/11/2017 | 24                    | 901.5         |
|                  | 12/18/2017 | 31                    | 1073.5        |
|                  | 12/26/2017 | 39                    | 990           |
|                  | 1/2/2018   | 46                    | 0             |
|                  | 1/5/2018   | 49                    | 0             |
|                  | 1/9/2018   | 53                    | 0             |
| A17113           | 1/23/2018  | 67                    | 0             |
|                  | 1/30/2018  | 74                    | 0             |
|                  | 3/7/2018   | pre                   | 0             |
|                  | 3/26/2018  | 3                     | 0             |
|                  | 4/2/2018   | 10                    | 0             |
|                  | 4/9/2018   | 17                    | 0             |
|                  | 4/16/2018  | 24                    | 0             |
|                  | 4/23/2018  | 31                    | 0             |
|                  | 4/30/2018  | 38                    | 580.5         |
|                  | 5/8/2018   | 39                    | 0             |
| 5/15/2018        | 53         | 0                     |               |
| 5/29/2018        | 67         | 0                     |               |

\* pre=prior to transplantation

**Table S2. Sequence and chromosomal location of predicted off target (OT) sites for the given *HBG* CRISPR/Cas9.**

| Site      | Sequence                 | Mismatch | Chr Position              | Feature    | Closest Gene | Distance |
|-----------|--------------------------|----------|---------------------------|------------|--------------|----------|
| HBG2      | CTTGTC AAGGCTATTGGTCAAGG | 0        | Chr14:68146744-68146766   | Intergenic | HBG2         | 5027     |
| HBG1      | CTTGTC AAGGCTATTGGTCAAGG | 0        | Chr14:68151619-68151641   | Intergenic | HBG1         | 152      |
| HPFH_OT1  | ACTGCCAAGGTTATTGGTCAGGG  | 3        | Chr3:119048921-119048943  | Intergenic | MIOS         | 246097   |
| HPFH_OT2  | TTTGTCACTCTATTGGTCAGGG   | 3        | Chr6:74872900-74872922    | Intergenic | LHFPL2       | 129513   |
| HPFH_OT3  | CTTGTC AAGCTCTTGGTCACGG  | 2        | Chr13:135158651-135158673 | Intergenic | POLR2D       | 835527   |
| HPFH_OT4  | GTTTTCCAGGCTGTTGGTCAGGG  | 3        | Chr6:37873275-37873297    | Intergenic | SLC1A3       | 1456991  |
| HPFH_OT5  | TTTGTCCAGTCCATTGGTCATGG  | 3        | Chr13:128967907-128967929 | Intergenic | TSN          | 964448   |
| HPFH_OT6  | CTTGACAAGGAAATTGGTCAGGG  | 3        | Chr9:116331574-116331596  | Intergenic | C9H10orf82   | 39765    |
| HPFH_OT7  | TTTGTCAAAGATGTTGGTCAAGG  | 3        | Chr12:54796260-54796282   | Intergenic | STAT1        | 93898    |
| HPFH_OT8  | GTGGTCAAGGGTAGTGGTCAAGG  | 3        | Chr9:111226641-111226663  | Intergenic | SHOC2        | 512613   |
| HPFH_OT9  | ACTGTCAGGGCTATTAGTCAAGG  | 3        | Chr18:69276951-69276973   | Intergenic | CNDP2        | 1272868  |
| HPFH_OT10 | ATTGCAAAGGCTATTGTCAGGG   | 3        | Chr5:132482924-132482946  | Intergenic | MGST2        | 310884   |
| HPFH_OT11 | CTGGTCAAGGCAATTAGTCAAGG  | 3        | Chr1:216816699-216816721  | Intergenic | GREM2        | 277643   |
| HPFH_OT12 | ATTGTCATGGCTGTTAGTCATGG  | 3        | Chr4:131521060-131521082  | Intron     | MOXD1        | n.a.     |
| HPFH_OT13 | GTTGTCAAGGCCACAGGTCAGGG  | 3        | Chr4:15460184-15460206    | Intergenic | MYLIP        | 643672   |
| HPFH_OT14 | GTTGTCAAGGCTGAAGGTCAAGG  | 3        | Chr16:70782012-70782034   | Intron     | TMEM94       | n.a.     |
| HPFH_OT15 | GTCATCAAGGCTATTGGCCAAGG  | 3        | Chr6:142055751-142055773  | Intergenic | RBM27        | 600053   |
| HPFH_OT16 | GATGTGAAGGCTATTGGACACGG  | 3        | ChrX:145053434-145053456  | Intergenic | MIR513b-2    | 271816   |
| HPFH_OT17 | ATTGACCAGGCTATTGGCCAAGG  | 3        | Chr11:38329402-38329424   | Intergenic | CNTN1        | 356141   |
| HPFH_OT18 | TTTGCCAAGGCTAATGTTCAAGG  | 3        | Chr11:29411539-29411561   | Intergenic | FAR2         | 192521   |
| HPFH_OT19 | CTTCTCATGGCTATTGGTCTTGG  | 3        | Chr8:102881659-102881681  | Intergenic | ANKRD46      | 148033   |
| HPFH_OT20 | GTTGTCAAGGATATGGGGCAAGG  | 3        | Chr7:112755032-112755054  | Intergenic | RPS29        | 114615   |
| HPFH_OT21 | CTTGTCAGGGCTGTTGGTCGAGG  | 3        | Chr6:133895388-133895410  | Intron     | SPOCK1       | n.a.     |
| HPFH_OT22 | CTTGTC AAGGCCATGGGTGATGG | 3        | Chr5:139683522-139683544  | Intron     | EDNRA        | n.a.     |
| HPFH_OT23 | GTTGTCAAGGATATTAGTCTGGG  | 3        | Chr16:24240380-24240402   | Intergenic | RPL35A       | 4122     |

**Table S2. Sequence and chromosomal location of predicted off target (OT) sites for the given *HBG* CRISPR/Cas9.**

| Site      | Sequence                 | Mismatch | Chr Position             | Feature    | Closest Gene | Distance |
|-----------|--------------------------|----------|--------------------------|------------|--------------|----------|
| HPFH_OT24 | ATTGTCG-GGCTATTGGTCAGGG  | 1        | Chr7:140456710-140456731 | Intron     | POMT2        | n.a.     |
| HPFH_OT25 | TTTCTCAAGGC-ATTGGTCAAGG  | 1        | Chr11:14866139-14866160  | Intergenic | H2AFJ        | 273174   |
| HPFH_OT26 | TTTCTCAAGGC-ATTGGTCAAGG  | 1        | Chr11:14872421-14872442  | Intergenic | H2AFJ        | 266892   |
| HPFH_OT27 | TTTCTCAAGGC-ATTGGTCAAGG  | 1        | Chr16:26114543-26114564  | Intergenic | CCL4L1       | 6785     |
| HPFH_OT28 | TTTCTCAAGGC-ATTGGTCAAGG  | 1        | Chr16:26359001-26359022  | Intergenic | OMG          | 109267   |
| HPFH_OT29 | TTTCTCAAGGC-ATTGGTCAAGG  | 1        | ChrX:153382980-153383001 | Intergenic | CLIC2        | 94545    |
| HPFH_OT30 | TTTCTCAAGGC-ATTGGTCAAGG  | 1        | ChrX:63088144-63088165   | Intergenic | ZC4H2        | 431263   |
| HPFH_OT31 | TTTCTCAAGGC-ATTGGTCAAGG  | 1        | ChrX:76890131-76890152   | Intergenic | PGK1         | 51959    |
| HPFH_OT32 | TTTGGCAAGGC-ATTGGTCAAGG  | 1        | Chr7:120344414-120344435 | Intergenic | AP5M1        | 41475    |
| HPFH_OT33 | TTTCTCAAGGCT-TTGGTCAAGG  | 1        | Chr6:157394190-157394211 | Intergenic | GABRB2       | 293307   |
| HPFH_OT34 | TTTGT-AAGGCTATTGTTTCATGG | 1        | Chr6:140863923-140863944 | Intron     | KCTD16       | n.a.     |
| HPFH_OT35 | CTTTCCAGGCTATTGGTCAAAG   | 2        | Chr3:107679707-107679729 | Intergenic | FERD3L       | 676025   |

**Table S3. List of antibodies used for flow cytometric analysis.**

| <b>Epitope</b> | <b>Clone</b> | <b>Company</b> |
|----------------|--------------|----------------|
| CD3            | SP34-2       | BD Biosciences |
| CD4            | L200         | BD Biosciences |
| CD8a           | RPA-T8       | BD Biosciences |
| CD11b          | ICRF44       | BioLegend      |
| CD14           | M5E2         | BD Biosciences |
| CD16           | 3G8          | BD Biosciences |
| CD20           | 2H7          | BD Biosciences |
| CD34           | 563          | BD Biosciences |
| CD45           | D058-1283    | BD Biosciences |
| CD45RA         | 5H9          | BD Biosciences |
| CD90           | 5E10         | BD Biosciences |
| p53            | 7F5          | Cell Signaling |

**Table 4 List of primers.**

| <b>Assay</b>                       | <b>Name</b>    | <b>Sequence (5'-3')</b>                                |
|------------------------------------|----------------|--------------------------------------------------------|
| sequencing/TIDE                    | HbG F4         | CTATGCCTAAAACACGTGTCAC                                 |
|                                    | HbG R1         | CTCCCAAGGAAGTCAGCAC                                    |
| Next generation sequencing (Miseq) | Miseq HbG F1   | TCGTCGGCAGCGTCAGATGTGTATAAGAGACAGCCCACACTATCTCAATGC    |
|                                    | Miseq HbG R3   | GTCTCGTGGGCTCGGAGATGTGTATAAGAGACAGGTTCCAGAAGCGAGTGTGTG |
| ddPCR deletion                     | HbG-F          | GTCTTAGAATAAGATTCCTGAGA                                |
|                                    | HbG-R          | TATTGATAATCTCAGCCGTTCC                                 |
|                                    | HbG1 FAM probe | ACCCTGGTCATCAGCCAGCACA                                 |
|                                    | HbG2 HEX probe | ACCTGGGTCATCAGCCAGCACA                                 |
| Large HBG1/HBG2 deletion           | HbG F4         | CTATGCCTAAAACACATTTCA                                  |
|                                    | HbG R1         | CTCCCAAGGAAGTCAGCAC                                    |
